# Supplementary material
Source: PubMed Central journal article supplement (PMC1740975)
Supplement: oenvmed_62_3_205__1.pdf [file oenvmed_62_3_205__1.pdf]

## Web-only References

- w1. Adkins JA, Weiss HM. Program evaluation: the bottom line in organizational health. In: Quick JC, Tetrick LE, eds. *Handbook of Occupational Health Psychology*. Washington DC: American Psychological Association, 2003:399–416.
- w2. Bartholomew LK, Parcel GS, Kok G. Intervention mapping: A process for developing theory- and evidence-based health education programs. *Health Educ Behav* 1998;**25**:545–63.
- w3. Burke RJ. Organizational-level interventions to reduce occupational stressors. *Work Stress* 1993;**7**:77–87.
- w4. Cook TD, Campbell DT. *Quasi-experimentations: design & analysis issues for field settings*. Chicago: Rand McNally College Publishing Co, 1979.
- w5. Cook TD, Campbell DT, Peracchio L. Quasi experimentation. In: Dunnette MD, Hough LM, eds. *Handbook of Industrial and Organizational Psychology*. Palo Alto, CA: Consulting Psychologists Press, 1990:491–576.
- w6. Cox T, Griffiths AJ, Barlow CA, *et al.* *Organisational interventions for work stress*. Sudbury: HSE Books, 2000.
- w7. Griffiths A. Organizational interventions. Facing the limits of the natural science paradigm. *Scand J Work Environ Health* 1999;**25**:589–96.
- w8. Heaney CA. Worksite health interventions: Targets for change and strategies for attaining them. In: Quick JC, Tetrick LE, eds. *Handbook of Occupational Health Psychology*. Washington, DC: American Psychological Association, 2003:305–23.

- w9. Hulshof CTJ, Verbeek JHAM, van Dijk FJH, *et al.* Evaluation research in occupational health services: general principles and a systematic review of empirical studies. *Occup Environ Med* 1999;**56**:361–77.
- w10. Israel BA, Schurman SJ, Hugentobler MK. Conducting action research: relationship between organization members and researchers. *J Appl Behav Sci* 1992;**28**:74–101.
- w11. Karasek R. Stress prevention through work reorganization: a summary of 19 international case studies. *Cond Work Digest* 1992;**11**:23–41.
- w12. Kompier MAJ, Geurts SAE, Gründemann RWM, *et al.* Cases in stress prevention: The success of a participative and stepwise approach. *Stress Med* 1998;**14**:155–68.
- w13. Kompier MAJ, Kristensen TS. Organizational work stress interventions in a theoretical, methodological and practical context. In: Dunham J, ed. *Stress in the workplace. Past, present and future*. London: Whurr Publishers Ltd, 2000:164–190.
- w14. Kristensen TS. Workplace intervention studies. In: Schnall PL, Belkic K, Landsbergis P, Baker D. The workplace and cardiovascular disease. *Occup Med: State of the art reviews* 2000;**15**(1):293–305.
- w15. Nytrø K, Saksvik PØ, Mikkelsen A, *et al.* An appraisal of key factors in the implementation of occupational stress interventions. *Work Stress* 2000;**14**:213–25.
- w16. Patton MQ. *Qualitative evaluation and research methods*. Newbury Park, CA: Sage Publications, 1990.
- w17. Sechrest L, Figueredo AJ. Program evaluation. *Ann Rev Psychol* 1993;**44**:645–74.
- w18. Semmer NK. Job stress interventions and organization of work. In: Quick JC, Tetrick LE, eds. *Handbook of Occupational Health Psychology*. Washington, DC: American Psychological Association, 2003:325–53

- w19. Shannon H. Evaluating the effectiveness of interventions for occupational trauma. *Safety Sci Monitor* 1998;**3**:1–10.
- w20. Skov T, Kristensen TS. Etiologic and prevention effectiveness studies in occupational health. *Am J Industr Med* 1996;**29**:378–81.
- w21. van der Hek H, Plomp HN. Occupational stress management programmes: a practical overview of published effect studies. *Occup Med* 1997;**47**:133–41.
- w22. van Poppel MN, Koes BW, Smid T, *et al.* A systematic review of controlled clinical trials on the prevention of back pain in industry. *Occup Environ Med* 1997;**54**:841–7.
- w23. Westgaard RH, Winkel J. Ergonomic intervention research for improved musculoskeletal health: a critical review. *Int J Ind Ergon* 1997;**20**:463–500.
- w24. In: Wickström G, ed. *Intervention studies in the health care work environment. Lessons learned.* Arbete och Hälsa No.2000:10. Stockholm: National Institute of Working Life, 2000.
- w25. Zwierling C, Daltroy LH, Fine LJ, *et al.* Design and conduct of occupational injury intervention studies: a review of evaluation strategies. *Am J Industr Med* 1997;**32**:164–79.
- w26. Yin RK. *Case study research. Design and methods.* Applied social research methods series. Vol. 5. Thousand Oaks, London, New Delhi: Sage Publications, 1994.
- w27. Steckler A, McLeroy KR, Goodman RM, *et al.* Toward integrating qualitative and quantitative methods: an introduction. *Health Educ Q* 1992;**19**:1–8.

- w28. Carlier IVE, Voerman AE, Gersons BPR. The influence of occupational debriefing on post-traumatic stress symptomatology in traumatized police officers. *Br J Med Psychol* 2000;**73**:87–98.
- w29. Everly GS, Boyle SH, Lating JM. The effectiveness of psychological debriefing with vicarious trauma: a meta-analysis. *Stress Med* 1999;**15**:229–33.
- w30. Hobbs M, Mayou R, Harrison B, *et al.* A randomised controlled trial of psychological debriefing for victims of road traffic accidents. *BMJ* 1996;**313**:1438–9.
- w31. Rose S, Bisson J, Wessely S. *Psychological debriefing for preventing post traumatic stress disorder (PTSD)* (Cochrane Review). In: The Cochrane Library, Issue 2. Oxford: Update Software, 2002.
- w32. Rose S, Bisson J. Brief early psychological interventions following trauma: a systematic review of the literature. *J Traumatic Stress* 1998;**11**:697–710.
- w33. Rose S, Brewin CR, Andrews B, *et al.* A randomized controlled trial of individual psychological debriefing for victims of violent crime. *Psychol Med* 1999;**29**:793–9.
- w34. Hernberg S, Tolonen M, Nurminen M. Eight-year follow-up of viscose rayon workers exposed to carbon disulfide. *Scand J Work Environ Health* 1976;**2**:27–30.
- w35. Tolonen M, Nurminen M, Hernberg S. Ten-year coronary mortality of workers exposed to carbon disulfide. *Scand J Work Environ Health* 1979;**5**:109–14.
- w36. Gomel M, Oldenburg B, Simpson JM, *et al.* Work-site cardiovascular risk reduction: a randomized trial of health risk assessment, education, counselling, and incentives. *Am J Public Health* 1993;**83**:1231–8.
- w37. Evans GW, Johansson G, Rydstedt L. Hassles on the job: a study of a job intervention with urban bus drivers. *J Organiz Behav* 1999;**20**:199–208.

- w38. Johansson G, Evans GW, Rydstedt LW, *et al.* Job hassles and cardiovascular reaction patterns among urban bus drivers. *Int J Behav Med* 1998;**5**:267–80.
- w39. Dishman RK, Oldenburg B, O’Neal H, *et al.* Worksite physical activity interventions. *Am J Prev Med* 1998;**15**:344–61.
- w40. Dyreborg J, Mikkelsen KL. Evaluation of an accident investigation tool using a safety perception maturity scale. *Safety Sci Monitor* 2003;**7**:1–9.
- w41. Guastello SJ. Do we really know how well our occupational accident prevention programs work? *Safety Sci* 1993;**16**:445–63.
- w42. Kaminski M. Unintended consequences: Organizational practices and their impact on workplace safety and productivity. *J Occup Health Psychol* 2001;**6**:127–38.
- w43. Karas BE, Conrad KM. Back injury prevention interventions in the workplace: an integrative review. *AAOHN J* 1996;**44**:189–96.
- w44. Karjalainen K, Malmivaara A, Pohjolainen T, *et al.* Mini-intervention for subacute low back pain. A randomized controlled trial. *Spine* 2003;**28**:533–41.
- w45. Kemmlert K. Economic impact of ergonomic intervention – Four case studies. *J Occup Rehab* 1996;**6**:17–32.
- w46. Laflamme L. Technological improvement of the production process and accidents: an equivocal relationship. *Safety Sci* 1993;**16**:249–66.
- w47. Lund J, Aarø LE. Accident prevention. Presentation of a model placing emphasis on human, structural and cultural factors. *Safety Sci* 2004;**42**:271–324.
- w48. Michie S, Wren B, Williams S. Reducing absenteeism in hospital cleaning staff: pilot of a theory based intervention. *Occup Environ Med* 2004;**61**:345–9.

w49. Oldenburg B, Glanz K, French M. The application of staging models to the understanding of health behaviour change and the promotion of health. *Psychol Health* 1999;**14**:503–16.

w50. Symonds TL, Burton K, Tillotson KM, *et al.* Absence resulting from low back trouble can be reduced by psychosocial intervention at the work place. *Spine* 1995;**20**:2738–45.
